# Supplementary material for: Common Reactivity and Properties of Heme Peroxidases: A DFT Study of Their Origin
Source: MDPI journal article supplement (doi:10.3390/antiox12020303), 2023-01-28
Supplement: s1 [file s1]

## Supplementary Information

### Common reactivity and properties of heme peroxidases: a DFT study of their origin

Daniel R. Ramos \*, Paul G. Furtmüller, Christian Obinger, Ángeles Peña-Gallego, Ignacio Pérez-Juste, J. Arturo Santaballa \*

**Table S1.** Relevant geometrical parameters for all studied species fully optimized at the B3LYP/cc-pVDZ computational level for all considered spin states. Distance (Å) between iron and imidazole nitrogen atom (Fe–N<sub>i</sub>), the metal centre and either ferryl or water oxygen (Fe–O) or proton (Fe–H), and between ferryl oxygen and proton or hydrogen atom from the water molecule (O–H); mean distance (Å) between iron and the four pyrrole nitrogen atoms (Fe–N<sub>p</sub>); and distance (Å) from Fe atom to heme pyrrole plane (Fe–pp). Positive values of the latter indicate displacement towards distal side, while negative figures stand for out-of-plane Fe placed at the opposite side. Bond orders are shown in parentheses, values under Fe–N<sub>p</sub> account for total iron-pyrrole nitrogen bond order, *i.e.* the overall order of those four covalent bonds. N<sub>i</sub>–Fe–O, N<sub>i</sub>–Fe–H, and Fe–O–H stand for the angles (°) among these atoms.

| Species                     | Spin | Fe–N <sub>i</sub> | Fe–N <sub>p</sub> | Fe–pp  | Fe–O/H       | O–H          | N <sub>i</sub> –Fe–O/H | Fe–O–H |
|-----------------------------|------|-------------------|-------------------|--------|--------------|--------------|------------------------|--------|
| Fe(III)-PO                  | 1/2  | 1.924 (0.63)      | 1.997 (2.24)      | –0.151 |              |              |                        |        |
|                             | 5/2  | 2.093 (0.33)      | 2.075 (1.52)      | –0.391 |              |              |                        |        |
| Fe(III)-PO-H <sub>2</sub> O | 1/2  | 1.948 (0.60)      | 2.012 (2.22)      | –0.063 | 2.056 (0.39) |              | 179.54                 |        |
|                             | 5/2  | 2.156 (0.32)      | 2.064 (1.47)      | –0.139 | 2.304 (0.22) |              | 179.25                 |        |
| Fe(III)-PO-H                | 1/2  | 2.111 (0.39)      | 2.002 (2.05)      | –0.100 | 1.493 (0.74) |              | 179.67                 |        |
|                             | 5/2  | 2.093 (0.37)      | 2.070 (1.53)      | –0.324 | 1.545 (0.50) |              | 177.25                 |        |
| Fe(II)-PO                   | 0    | 1.974 (0.55)      | 2.022 (2.01)      | –0.150 |              |              |                        |        |
|                             | 1    | 2.387 (0.21)      | 2.020 (1.90)      | –0.103 |              |              |                        |        |
|                             | 2    | 2.213 (0.26)      | 2.103 (1.24)      | –0.327 |              |              |                        |        |
| Fe(II)-PO-H <sub>2</sub> O  | 0    | 2.024 (0.49)      | 2.029 (2.00)      | –0.059 | 2.123 (0.35) |              | 179.28                 |        |
|                             | 1    | 2.395 (0.21)      | 2.021 (1.90)      | –0.088 | 2.861 (0.11) |              | 170.99                 |        |
|                             | 2    | 2.220 (0.26)      | 2.101 (1.23)      | –0.295 | 2.907 (0.09) |              | 169.51                 |        |
| Fe(II)-PO-H                 | 0    | 2.149 (0.37)      | 2.013 (2.07)      | –0.048 | 1.483 (0.79) |              | 179.79                 |        |
|                             | 1    | 2.136 (0.37)      | 2.011 (2.07)      | –0.079 | 1.493 (0.76) |              | 179.73                 |        |
|                             | 2    | 2.135 (0.35)      | 2.084 (1.36)      | –0.169 | 1.507 (0.70) |              | 179.93                 |        |
| PO-I                        | 1/2  | 2.149 (0.35)      | 2.023 (2.04)      | 0.091  | 1.630 (1.42) |              | 179.80                 |        |
|                             | 5/2  | 2.152 (0.34)      | 2.085 (1.38)      | 0.126  | 1.627 (1.42) |              | 179.77                 |        |
| PO-I-H <sub>2</sub> O       | 1/2  | 2.141 (0.36)      | 2.021 (2.06)      | 0.094  | 1.634 (1.39) | 1.845 (0.04) | 179.82                 | 126.15 |
|                             | 5/2  | 2.144 (0.35)      | 2.083 (1.40)      | 0.127  | 1.631 (1.37) | 1.875 (0.04) | 179.81                 | 124.56 |
| PO-I-H                      | 1/2  | 2.056 (0.45)      | 2.017 (2.00)      | 0.021  | 1.800 (0.91) | 0.973 (0.76) | 176.95                 | 110.93 |
|                             | 5/2  | 2.160 (0.35)      | 2.059 (1.56)      | 0.089  | 1.810 (0.82) | 0.973 (0.74) | 178.52                 | 112.79 |
| PO-II                       | 1    | 2.193 (0.32)      | 2.024 (2.09)      | 0.111  | 1.628 (1.44) |              | 179.84                 |        |
|                             | 2    | 2.207 (0.30)      | 2.085 (1.43)      | 0.163  | 1.629 (1.42) |              | 179.86                 |        |
| PO-II-H <sub>2</sub> O      | 1    | 2.178 (0.33)      | 2.022 (2.10)      | 0.112  | 1.634 (1.40) | 1.798 (0.05) | 179.62                 | 121.73 |
|                             | 2    | 2.196 (0.31)      | 2.083 (1.44)      | 0.163  | 1.635 (1.37) | 1.827 (0.05) | 179.52                 | 121.32 |
| PO-II-H                     | 1    | 2.069 (0.43)      | 2.025 (2.03)      | 0.030  | 1.807 (0.90) | 0.972 (0.77) | 178.06                 | 109.19 |
|                             | 2    | 2.389 (0.22)      | 2.034 (1.86)      | 0.138  | 1.903 (0.63) | 0.971 (0.77) | 179.76                 | 113.72 |

**Table S2.** Relevant geometrical parameters obtained experimentally for selected peroxidases: horseradish peroxidase (HRP), cytochrome c peroxidase (CCP), ascorbate peroxidase (APX), lactoperoxidase (LPO), and myeloperoxidase (MPO). Distance (Å) between iron and imidazole nitrogen atom (Fe–N<sub>i</sub>), the metal centre and either ferryl or water oxygen (Fe–O), and between ferryl oxygen and its proton (O–H); mean distance (Å) between iron and the four pyrrole nitrogen atoms (Fe–N<sub>p</sub>); and distance (Å) from Fe atom to heme pyrrole plane (Fe–pp). Positive values of the latter indicate displacement towards distal side, while negative figures stand for out-of-plane Fe placed at the opposite side. N<sub>i</sub>–Fe–O and Fe–O–H stand for the angles (°) among these atoms.

| Species     | Peroxidase | PDB               | Fe–N <sub>i</sub> | Fe–N <sub>p</sub> | Fe–pp  | Fe–O  | O–H   | N <sub>i</sub> –Fe–O | Fe–O–H |
|-------------|------------|-------------------|-------------------|-------------------|--------|-------|-------|----------------------|--------|
| Ferric      | HRP        | 1W4W <sup>a</sup> | 2.093             | 2.021             | –0.140 | –     |       | –                    |        |
|             | CCP        | 1ZBY <sup>b</sup> | 2.107             | 2.039             | –0.274 | 2.330 |       | 176.15               |        |
|             | CCP*       | 4CVI <sup>c</sup> | 2.024             | 2.055             | –0.181 | 2.651 |       | 169.64               |        |
|             | APX        | 1OAG <sup>d</sup> | 2.018             | 2.038             | –0.199 | 1.944 |       | 176.90               |        |
|             | LPO        | 2GJ1 <sup>e</sup> | 2.145             | 2.051             | –0.203 | –     |       | –                    |        |
|             | MPO        | 1CXP <sup>f</sup> | 2.187             | 1.989             | –0.321 | 2.899 |       | 178.06               |        |
|             |            |                   | 2.189             | 1.986             | –0.342 | 3.000 |       | 172.99               |        |
| Ferrous     | HRP        | 1H58 <sup>g</sup> | 2.133             | 2.028             | –0.245 | –     |       | –                    |        |
|             | CCP        | 2XJ8 <sup>h</sup> | 2.062             | 2.117             | –0.253 | 2.017 |       | 175.54               |        |
|             | APX        | 2XJ6 <sup>h</sup> | 2.013             | 2.104             | –0.220 | 2.306 |       | 177.77               |        |
| Compound I  | HRP        | 1HCH <sup>g</sup> | 2.141             | 2.009             | 0.028  | 1.705 |       | 177.05               |        |
|             | CCP        | 2XIL <sup>h</sup> | 2.099             | 2.050             | 0.077  | 1.635 |       | 178.92               |        |
|             | CCP*       | 4CVJ <sup>c</sup> | 2.124             | 2.039             | 0.098  | 1.645 |       | 169.51               |        |
|             | APX        | 2XI6 <sup>h</sup> | 2.033             | 2.092             | –0.087 | 1.743 |       | 176.11               |        |
| Compound II | HRP        | 1H55 <sup>g</sup> | 2.140             | 2.007             | 0.003  | 1.839 |       | 176.41               |        |
|             | CCP        | 2XJ5 <sup>h</sup> | 2.121             | 2.070             | –0.061 | 1.834 |       | 178.65               |        |
|             | APX        | 2XIF <sup>h</sup> | 1.994             | 2.027             | –0.134 | 1.830 |       | 178.12               |        |
|             | APX*       | 5JPR <sup>i</sup> | 1.970             | 2.006             | –0.081 | 1.879 | 0.986 | 178.76               | 142.28 |

\* Structures obtained by neutron diffraction. <sup>a</sup> Ref. 73. <sup>b</sup> Ref. 22. <sup>c</sup> Ref. 27. <sup>d</sup> Ref. 74. <sup>e</sup> Ref. 75. <sup>f</sup> Ref. 76. <sup>g</sup> Ref. 72. <sup>h</sup> Ref. 14.

<sup>i</sup> Ref. 28.

**Table S3.** Mulliken atomic charges (a.u.) on relevant atoms obtained at the B3LYP/cc-pVDZ computational level.  $N_i$ ,  $N_p$ ,  $O_{Fe}$ , and  $Por$  refer to imidazole nitrogen, total charge on the four pyrrole nitrogens, ferryl oxygen, and porphine, respectively.

| Species                     | Spin | Fe   | $N_i$ | $N_p$ | $O_{Fe}$ | H    | Por   | H <sub>2</sub> O |
|-----------------------------|------|------|-------|-------|----------|------|-------|------------------|
| Fe(III)-PO                  | 1/2  | 0.64 | -0.26 | -1.63 |          |      | -0.06 |                  |
|                             | 5/2  | 0.89 | -0.35 | -1.87 |          |      | -0.23 |                  |
| Fe(III)-PO-H <sub>2</sub> O | 1/2  | 0.32 | -0.23 | -1.43 |          |      | -0.11 | 0.33             |
|                             | 5/2  | 0.66 | -0.28 | -1.76 |          |      | -0.25 | 0.24             |
| Fe(III)-PO-H                | 1/2  | 0.21 | -0.26 | -1.35 |          | 0.11 | 1.34  |                  |
|                             | 5/2  | 0.54 | -0.35 | -1.74 |          | 0.32 | 0.79  |                  |
| Fe(II)-PO                   | 0    | 0.34 | -0.23 | -1.39 |          |      | -0.63 |                  |
|                             | 1    | 0.43 | -0.21 | -1.57 |          |      | -0.62 |                  |
|                             | 2    | 0.59 | -0.28 | -1.68 |          |      | -0.82 |                  |
| Fe(II)-PO-H <sub>2</sub> O  | 0    | 0.11 | -0.19 | -1.26 |          |      | -0.66 | 0.25             |
|                             | 1    | 0.26 | -0.20 | -1.54 |          |      | -0.59 | 0.13             |
|                             | 2    | 0.41 | -0.26 | -1.66 |          |      | -0.77 | 0.10             |
| Fe(II)-PO-H                 | 0    | 0.18 | -0.22 | -1.38 |          | 0.05 | 0.46  |                  |
|                             | 1    | 0.32 | -0.27 | -1.50 |          | 0.13 | 0.24  |                  |
|                             | 2    | 0.17 | -0.25 | -1.34 |          | 0.07 | 0.45  |                  |
| PO-I                        | 1/2  | 0.29 | -0.19 | -1.28 | -0.30    |      | 0.63  |                  |
|                             | 5/2  | 0.46 | -0.20 | -1.44 | -0.30    |      | 0.44  |                  |
| PO-I-H <sub>2</sub> O       | 1/2  | 0.29 | -0.18 | -1.28 | -0.35    |      | 0.66  | 0.00             |
|                             | 5/2  | 0.46 | -0.19 | -1.43 | -0.34    |      | 0.47  | 0.00             |
| PO-I-H                      | 1/2  | 0.26 | -0.21 | -1.23 | -0.32    | 0.19 | 1.44  |                  |
|                             | 5/2  | 0.40 | -0.22 | -1.35 | -0.36    | 0.20 | 1.36  |                  |
| PO-II                       | 1    | 0.26 | -0.18 | -1.34 | -0.34    |      | -0.25 |                  |
|                             | 2    | 0.43 | -0.18 | -1.51 | -0.35    |      | -0.43 |                  |
| PO-II-H <sub>2</sub> O      | 1    | 0.26 | -0.17 | -1.33 | -0.38    |      | -0.20 | -0.02            |
|                             | 2    | 0.42 | -0.18 | -1.49 | -0.39    |      | -0.38 | -0.01            |
| PO-II-H                     | 1    | 0.22 | -0.20 | -1.25 | -0.34    | 0.18 | 0.54  |                  |
|                             | 2    | 0.41 | -0.22 | -1.40 | -0.43    | 0.17 | 0.58  |                  |

**Table S4.** Gibbs free energy obtained with B3LYP/cc-pVDZ ( $T = 298.15$  K) for unprotonated species at ground spin state, and electron and proton published values employed in the study. Absolute values used as reference for data in Table 1.

| Species          | Spin             | $\Delta G^\circ$ / kJ mol <sup>-1</sup> |
|------------------|------------------|-----------------------------------------|
| e <sup>-</sup>   | 1/2              | -3.632 <sup>a</sup>                     |
| H <sup>+</sup>   | 1/2 <sup>b</sup> | -1130.90 <sup>c</sup>                   |
| Fe(III)-PO       | 5/2              | -3512299.76                             |
| Fe(II)-PO        | 2                | -3512768.13                             |
| PO-I             | 1/2              | -3709611.90                             |
| PO-II            | 1                | -3710115.40                             |
| H <sub>2</sub> O | 0                | -200643.65                              |

<sup>a</sup> Ref. 62. <sup>b</sup> Nuclear spin. <sup>c</sup> Refs. 59-61.

**Table S5.** Gibbs free energy values in  $\text{kJ mol}^{-1}$  for the dissociation equilibrium of  $\text{Fe(III)-PO-H}_2\text{O}$  ( $\Delta G^\circ_{\text{A-H}_2\text{O(aq)}}$ ), and distance values ( $\text{\AA}$ ) between iron and water oxygen ( $\text{Fe-O}_w$ ) obtained for the aqueous complex, corresponding bond orders are shown in parentheses. Data calculated by B3LYP and M06-2X functionals, with different basis sets for all atoms but Fe (LANL2DZ), and PCM at  $T = 298.15$  K. The most favourable spin multiplicities were used;  $\text{Fe(III)-PO}$  with  $S = 1/2$ , and  $\text{Fe(III)-PO-H}_2\text{O}$  with  $S = 1/2$  (B3LYP) or  $5/2$  (M06-2X).

| B3LYP           | $\Delta G^\circ_{\text{A-H}_2\text{O(aq)}}$ | Fe-O <sub>w</sub> |
|-----------------|---------------------------------------------|-------------------|
| 6-31G(d,p)      | -0.34                                       | 2.054 (0.38)      |
| 6-311G(2d,2p)   | -7.29                                       | 2.068 (0.37)      |
| 6-311++G(2d,2p) | -31.29                                      | 2.070 (0.36)      |
| cc-pVDZ         | 12.44                                       | 2.056 (0.39)      |
| cc-pVTZ         | -16.20                                      | 2.066 (0.36)      |
| Aug-cc-pVTZ     | -36.15                                      | 2.043 (0.37)      |
| cc-pVQZ         | -26.38                                      | 2.054 (0.37)      |
| M06-2X          | $\Delta G^\circ_{\text{A-H}_2\text{O(aq)}}$ | Fe-O <sub>w</sub> |
| 6-31G(d,p)      | 23.18                                       | 2.186 (0.23)      |
| 6-311G(2d,2p)   | 19.81                                       | 2.196 (0.22)      |
| 6-311++G(2d,2p) | 2.35                                        | 2.201 (0.21)      |
| cc-pVDZ         | 32.91                                       | 2.189 (0.24)      |
| cc-pVTZ         | 8.46                                        | 2.194 (0.21)      |
| Aug-cc-pVTZ     | 1.77                                        | 2.170 (0.21)      |
| cc-pVQZ         | 3.18                                        | 2.178 (0.21)      |

**Table S6.**  $\text{pK}_a$  values obtained for PO-I-H and PO-II-H through direct calculation ( $\text{pK}_a^1$ ) and with the isodesmic method ( $\text{pK}_a^2$ ). Data calculated by B3LYP and M06-2X functionals, with different basis sets for all atoms but Fe (LANL2DZ), and PCM at  $T = 298.15$  K. The most favourable spin multiplicities were used; PO-I and PO-I-H with  $S = 1/2$ , and PO-II and PO-II-H with  $S = 1$ .

| B3LYP           | PO-I-H          |                 | PO-II-H         |                 |
|-----------------|-----------------|-----------------|-----------------|-----------------|
|                 | $\text{pK}_a^1$ | $\text{pK}_a^2$ | $\text{pK}_a^1$ | $\text{pK}_a^2$ |
| 6-31G(d,p)      | -1.9            | -18.2           | 11.2            | -5.1            |
| 6-311G(2d,2p)   | -1.4            | -14.1           | 8.8             | -3.9            |
| 6-311++G(2d,2p) | -1.9            | -9.0            | 8.2             | 1.0             |
| cc-pVDZ         | -4.2            | -17.7           | 8.5             | -5.0            |
| cc-pVTZ         | -1.3            | -11.6           | 8.0             | -2.3            |
| Aug-cc-pVTZ     | -1.5            | -9.0            | 7.6             | 0.0             |
| cc-pVQZ         | -1.4            | -10.1           | 7.7             | -1.1            |
| M06-2X          | PO-I-H          |                 | PO-II-H         |                 |
|                 | $\text{pK}_a^1$ | $\text{pK}_a^2$ | $\text{pK}_a^1$ | $\text{pK}_a^2$ |
| 6-31G(d,p)      | 18.2            | 3.2             | 23.3            | 8.3             |
| 6-311G(2d,2p)   | 9.7             | -2.3            | 22.4            | 10.5            |
| 6-311++G(2d,2p) | 9.3             | 2.0             | 22.4            | 15.1            |
| cc-pVDZ         | 16.2            | 3.4             | 21.0            | 8.2             |
| cc-pVTZ         | 7.9             | -1.4            | 21.3            | 12.0            |
| Aug-cc-pVTZ     | 8.2             | 1.1             | 21.3            | 14.2            |
| cc-pVQZ         | 8.7             | 0.5             | 21.4            | 13.2            |

**Table S7.** Wavelength (nm) and molar absorption coefficient ( $\text{cm}^{-1}\cdot\text{mol}^{-1}\cdot\text{dm}^3$ ) of the Soret band obtained for all considered species and calculated with the B3LYP/cc-pVDZ computational method.

| Species                     | Spin | $\lambda$ | $\epsilon$ |
|-----------------------------|------|-----------|------------|
| Fe(III)-PO                  | 5/2  | 368       | 69925      |
| Fe(III)-PO-H <sub>2</sub> O | 1/2  | 372       | 71844      |
| Fe(III)-PO-H                | 1/2  | 369       | 19822      |
| Fe(II)-PO                   | 2    | 387       | 61976      |
| Fe(II)-PO-H <sub>2</sub> O  | 2    | 388       | 59915      |
| Fe(II)-PO-H                 | 1    | 373       | 37872      |
| PO-I                        | 1/2  | 373       | 57952      |
| PO-I-H <sub>2</sub> O       | 1/2  | 375       | 51619      |
| PO-I-H                      | 1/2  | 400       | 3433       |
| PO-II                       | 1    | 383       | 63192      |
| PO-II-H <sub>2</sub> O      | 1    | 384       | 59793      |
| PO-II-H                     | 1    | 370       | 56965      |

**Figure S1.** Calculated excitation lines and the corresponding convoluted UV-vis absorption spectra at the Soret region obtained with the TD-DFT functional with the B3LYP/cc-pVDZ computational level at the most stable spin state for (A) non-protonated Fe(III)-PO (—), Fe(II)-PO (—), PO-I (—), and PO-II (—); (B) corresponding aquo complexes; and (C) protonated species.

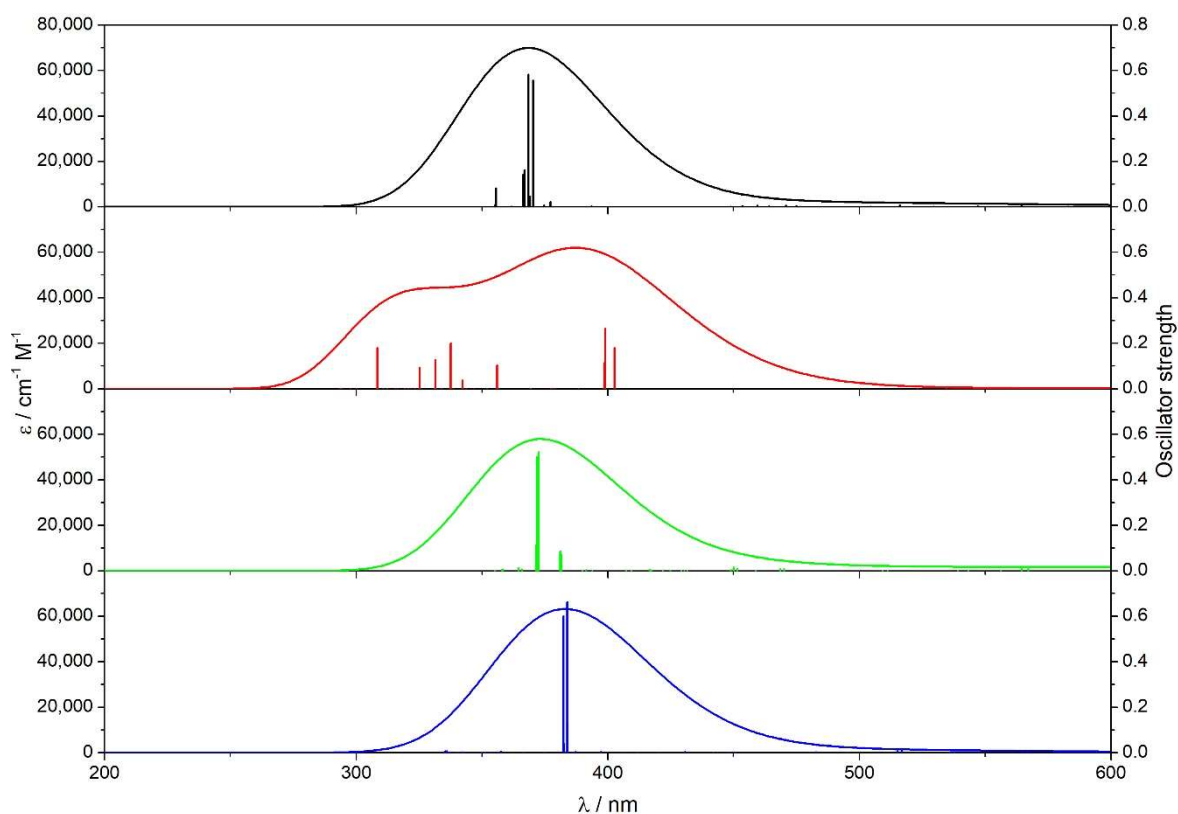

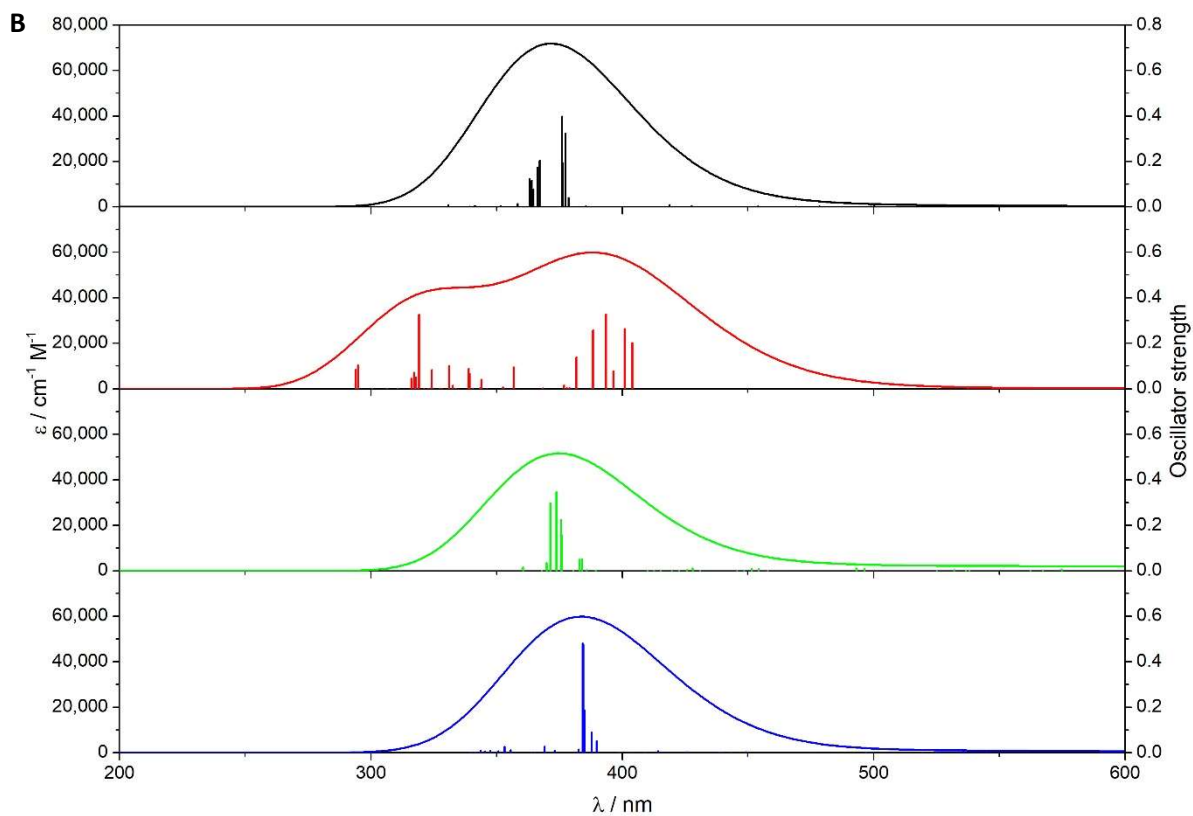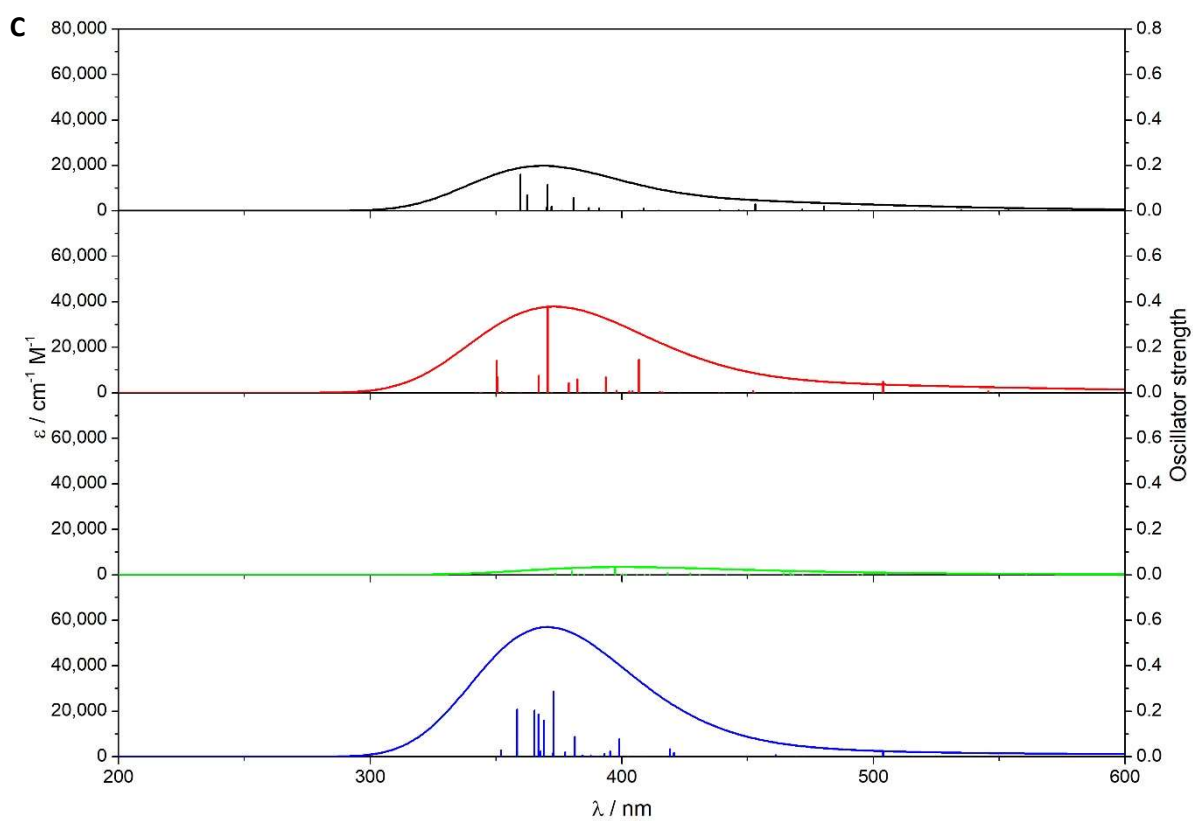

**Table S8.** Standard reduction potential ( $E^\circ$ ) values in mV relative to SHE calculated with direct and isodesmic methods, by B3LYP and M06-2X functionals, with different basis sets for all atoms but Fe (LANL2DZ), and PCM at  $T = 298.15$  K. The most favourable spin multiplicities were used (as specified in parentheses).

|                         | Redox couple                      |                                |                         |                           |                               |                                 |
|-------------------------|-----------------------------------|--------------------------------|-------------------------|---------------------------|-------------------------------|---------------------------------|
|                         | Fe(III)-PO/Fe(II)-PO<br>(5/2 – 2) | PO-I/Fe(III)-PO<br>(1/2 – 5/2) | PO-I/PO-II<br>(1/2 – 1) | PO-I/PO-II-H<br>(1/2 – 1) | PO-II/Fe(III)-PO<br>(1 – 5/2) | PO-II-H/Fe(III)-PO<br>(1 – 5/2) |
| <b>Direct method</b>    |                                   |                                |                         |                           |                               |                                 |
| <b>B3LYP</b>            |                                   |                                |                         |                           |                               |                                 |
| 6-31G(d,p)              | 227                               | 1136                           | 592                     | 1254                      | 1679                          | 1017                            |
| 6-311G(2d,2p)           | 308                               | 1279                           | 825                     | 1346                      | 1733                          | 1213                            |
| 6-311++G(2d,2p)         | 365                               | 1400                           | 859                     | 1345                      | 1941                          | 1456                            |
| cc-pVDZ                 | 377                               | 1066                           | 741                     | 1245                      | 1391                          | 886                             |
| cc-pVTZ                 | 300                               | 1324                           | 859                     | 1332                      | 1790                          | 1316                            |
| Aug-cc-pVTZ             | 121                               | 1420                           | 880                     | 1328                      | 1960                          | 1512                            |
| cc-pVQZ                 | 188                               | 1388                           | 876                     | 1329                      | 1900                          | 1448                            |
| <b>M06-2X</b>           |                                   |                                |                         |                           |                               |                                 |
| 6-31G(d,p)              | 652                               | 2449                           | 1403                    | 2783                      | 3496                          | 2116                            |
| 6-311G(2d,2p)           | 693                               | 2328                           | 1092                    | 2419                      | 3564                          | 2236                            |
| 6-311++G(2d,2p)         | 714                               | 2452                           | 1167                    | 2490                      | 3737                          | 2414                            |
| cc-pVDZ                 | 782                               | 2405                           | 1518                    | 2761                      | 3293                          | 2050                            |
| cc-pVTZ                 | 662                               | 2358                           | 1120                    | 2380                      | 3596                          | 2336                            |
| Aug-cc-pVTZ             | 409                               | 2468                           | 1199                    | 2461                      | 3736                          | 2475                            |
| cc-pVQZ                 | 484                               | 2443                           | 1164                    | 2431                      | 3723                          | 2456                            |
| <b>Isodesmic method</b> |                                   |                                |                         |                           |                               |                                 |
| <b>B3LYP</b>            |                                   |                                |                         |                           |                               |                                 |
| 6-31G(d,p)              | 17                                | 858                            | 382                     | 1045                      | 1470                          | 807                             |
| 6-311G(2d,2p)           | –46                               | 911                            | 472                     | 992                       | 1380                          | 860                             |
| 6-311++G(2d,2p)         | –110                              | 1033                           | 385                     | 870                       | 1467                          | 982                             |
| cc-pVDZ                 | 237                               | 798                            | 601                     | 1105                      | 1251                          | 747                             |
| cc-pVTZ                 | –98                               | 969                            | 460                     | 934                       | 1392                          | 918                             |
| Aug-cc-pVTZ             | –373                              | 1069                           | 386                     | 834                       | 1466                          | 1018                            |
| cc-pVQZ                 | –275                              | 1036                           | 414                     | 867                       | 1438                          | 985                             |
| <b>M06-2X</b>           |                                   |                                |                         |                           |                               |                                 |
| 6-31G(d,p)              | –872                              | 644                            | –121                    | 1259                      | 1973                          | 593                             |
| 6-311G(2d,2p)           | –708                              | 885                            | –310                    | 1018                      | 2162                          | 834                             |
| 6-311++G(2d,2p)         | –812                              | 939                            | –359                    | 964                       | 2211                          | 888                             |
| cc-pVDZ                 | –698                              | 621                            | 39                      | 1282                      | 1813                          | 570                             |
| cc-pVTZ                 | –770                              | 955                            | –312                    | 948                       | 2164                          | 904                             |
| Aug-cc-pVTZ             | –1133                             | 984                            | –342                    | 919                       | 2194                          | 933                             |
| cc-pVQZ                 | –1033                             | 989                            | –354                    | 914                       | 2206                          | 938                             |
